# Supplementary material
Source: PubMed Central journal article supplement (PMC10528928)
Supplement: NIHMS1914815-supplement-2.pdf [file NIHMS1914815-supplement-2.pdf]

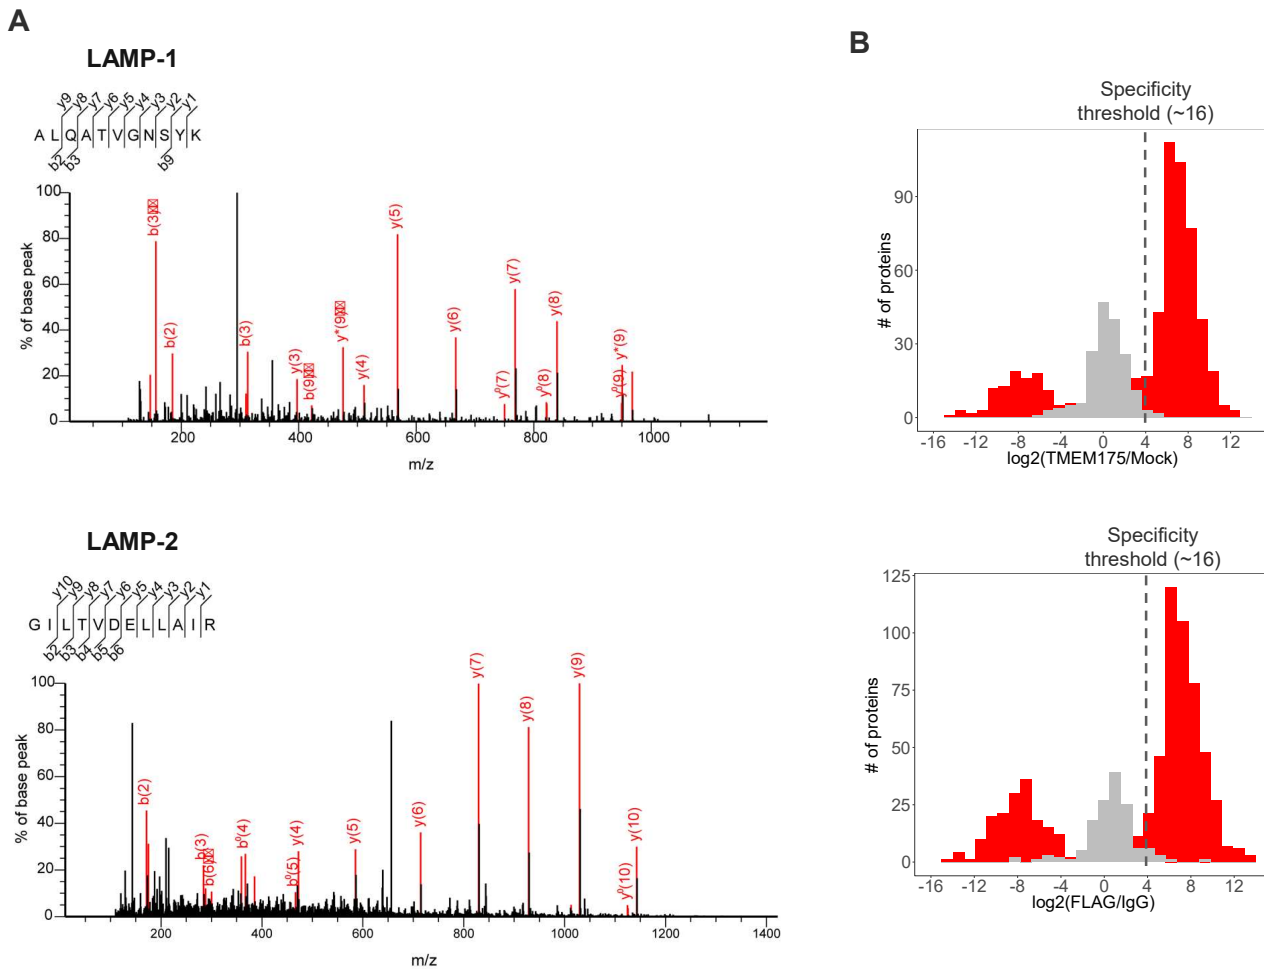

**Figure S1. proteomic screening of TMEM175-interacting proteins. Related to Figure 1.**

**(A)** Representative MS spectra of tryptic peptides of LAMP-1 and LAMP-2 identified from the TMEM175-FLAG pull-down samples.

**(B)** Histogram plots summarizing abundance ratios binned in the logarithm function with base two ( $\log_2$ ) between pull-down samples and controls. Upper panel: ratios between the protein amounts obtained in the samples after anti-FLAG antibody affinity purification using TMEM175-FLAG transfected cells (TMEM175) and empty-vector transfected cells (Mock control). Lower panel: ratios between the protein amounts obtained in the samples after affinity purification of TMEM175-FLAG transfected cells using anti-FLAG antibodies (FLAG) and un-immunized rabbit IgG antibodies (IgG control). High-confidence threshold for specificity is indicated by the dashed line. Grey bars mark the proteins detected in both the anti-FLAG pull-down sample of TMEM175-FLAG transfected cells and control samples. Red bars are proteins exclusively detected in the pull-down sample or the control samples.

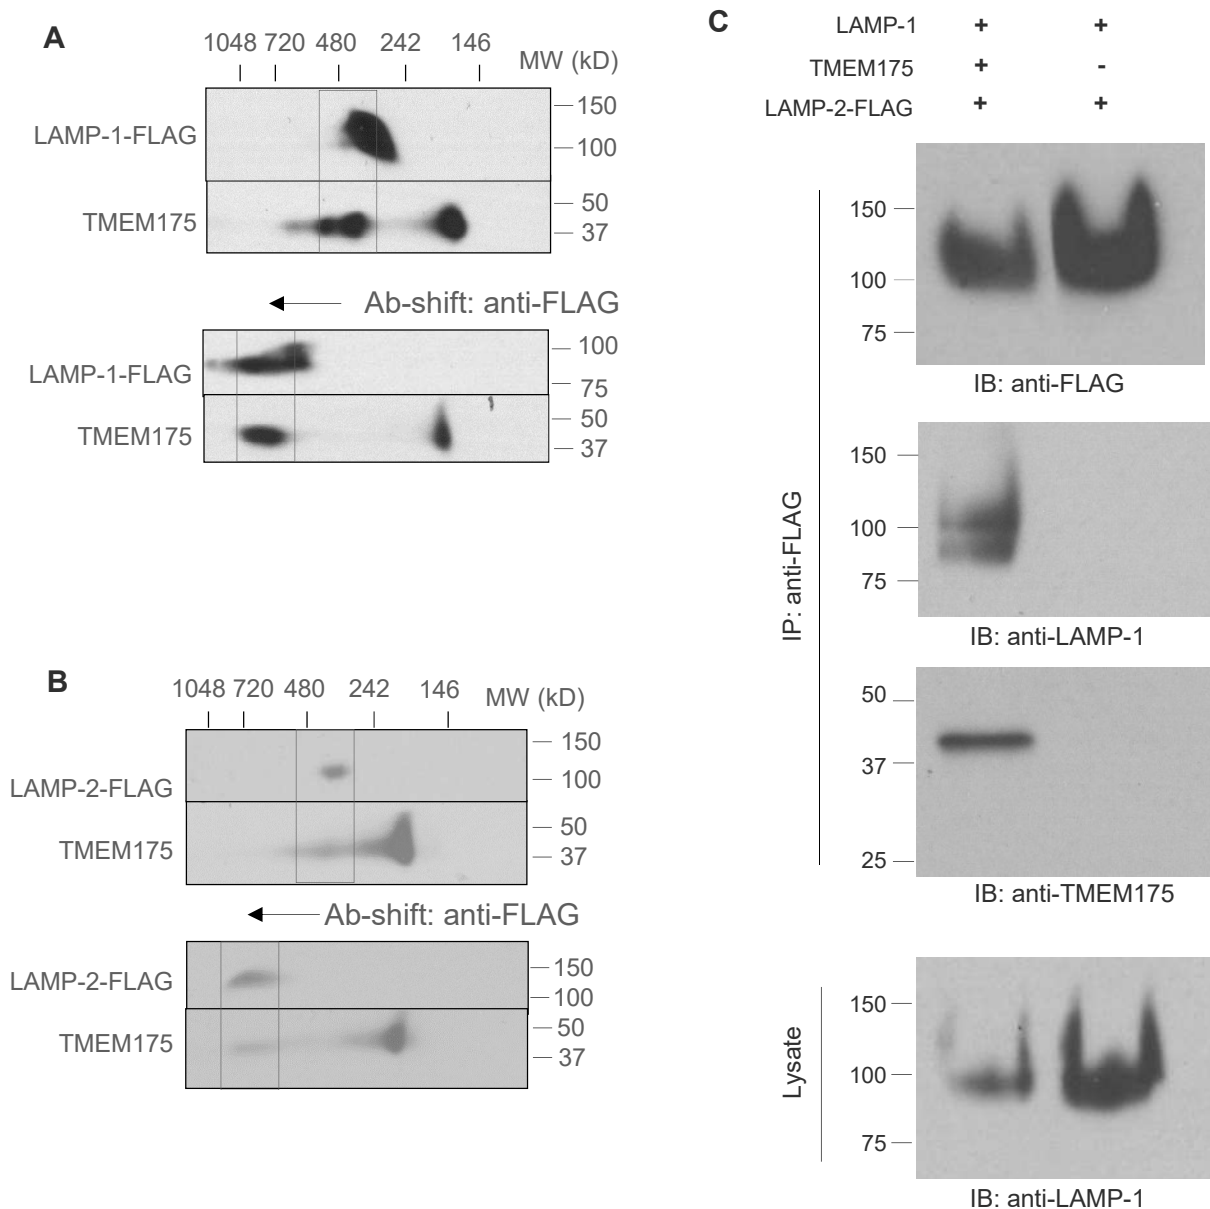

**Figure S2. Biochemical analysis of interactions between TMEM175 and LAMP-1 or LAMP-2. Related to Figure 1.**

(A) 2-D gel electrophoresis of cell lysate from HEK293 cells co-expressing un-tagged TMEM175 and FLAG-tagged LAMP-1 before and after mobility shift using anti-FLAG antibodies.

(B) 2-D gel electrophoresis of cell lysate from HEK293 cells co-expressing un-tagged TMEM175 and FLAG-tagged LAMP-2 before and after mobility shift using anti-FLAG antibodies.

(C) Co-IP of TMEM175 and LAMP proteins in HEK293 cells co-expressing untagged TMEM175 and LAMP-1, and FLAG-tagged LAMP-2. Overexpressed LAMP-2 was immunoprecipitated by anti-FLAG antibody and both TMEM175 and LAMP-1 were detected in the IP samples. In the control cells without TMEM175 co-expression, neither TMEM175 or LAMP-1 were detected in the IP samples. This result demonstrates that the dimeric TMEM175 can simultaneously interact with both LAMP-1 and 2, one on each side, but LAMP-1 and 2 do not interact with each other. This experiment is discussed in the **Limitations of the study**.

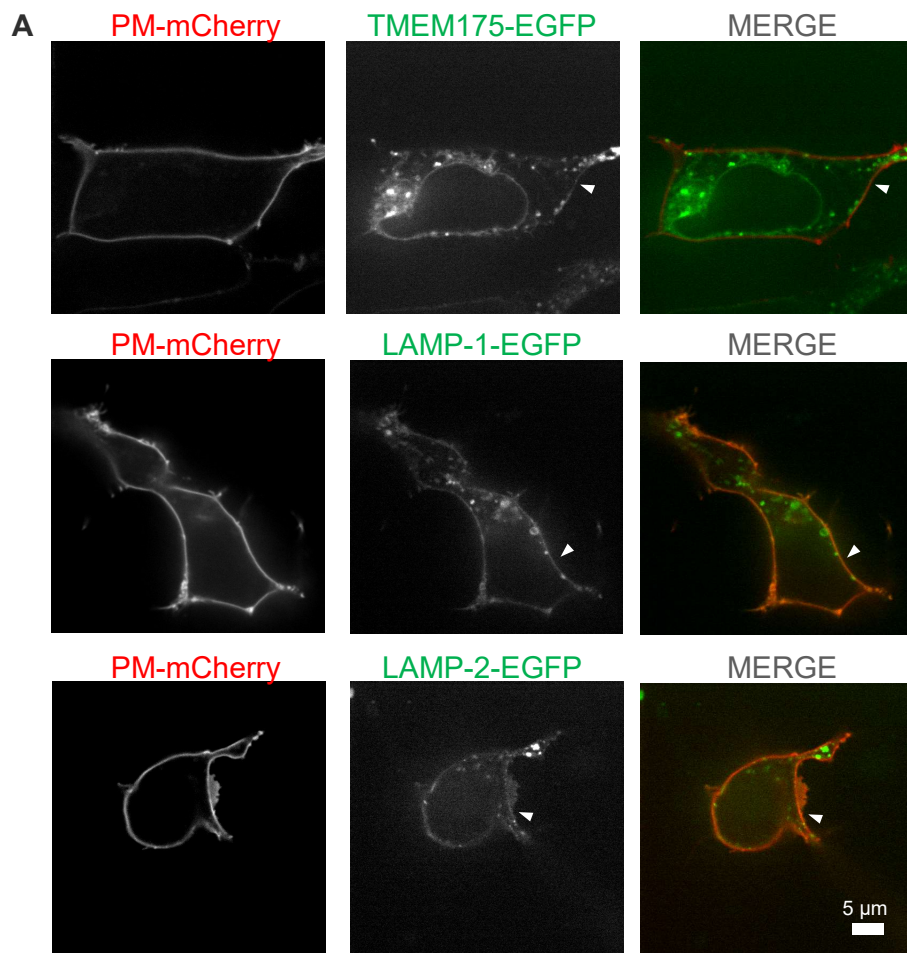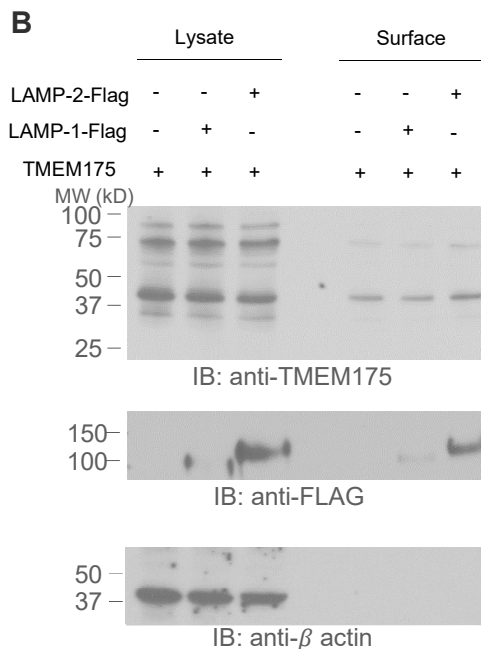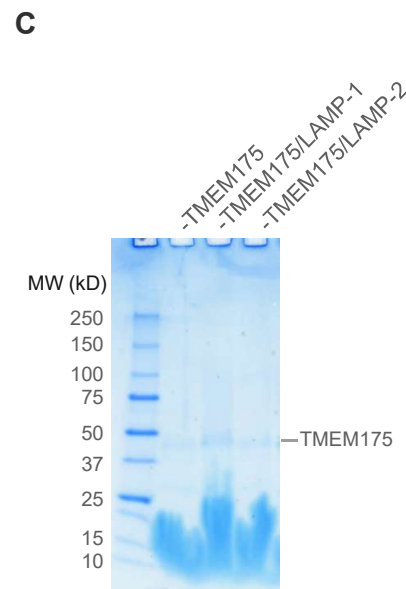

**Figure S3. Plasma membrane localization of TMEM175, LAMP-1, and LAMP-2 when overexpressed in HEK293 and the amount of TMEM175 in proteoliposomes. Related to Figure 2.**

(A) Confocal images of HEK293 cells co-expressing EGFP-tagged TMEM175, LAMP-1, or LAMP-2 with the plasma membrane marker KRas tail tagged with mcherry.

(B) Surface protein pulldown assay of HEK293 cells used for electrophysiology. The anti-FLAG antibodies were used to detect LAMP-1 and 2 in the total lysate and biotinylated surface proteins.

(C) SDS-PAGE of proteoliposomes containing TMEM175 alone, TMEM175/LAMP-1, or TMEM175/LAMP-2 indicating a comparable amount of TMEM175 in all samples

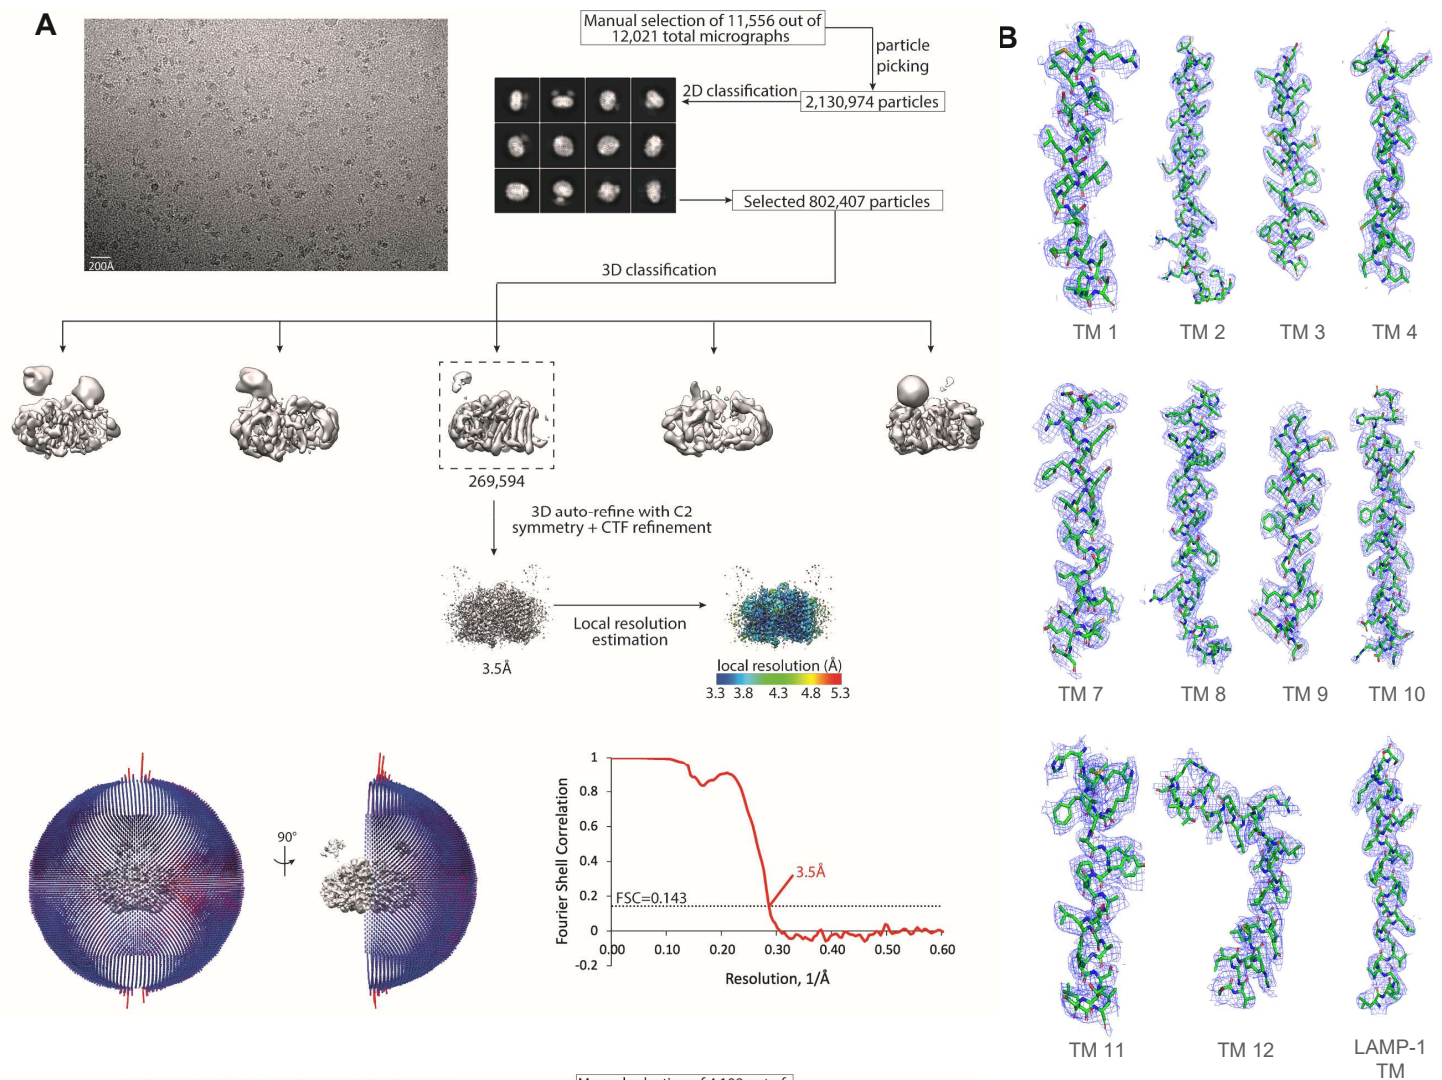

**Figure S4. Structural determination of TMEM175 in complex with LAMP-1 and LAMP-1-TM. Related to Figure 3.**

(A) Cryo-EM data processing scheme of TMEM175/LAMP-1 complex with Euler angle distribution of particles used in the final three-dimensional reconstruction. A representative micrograph and selected 2D class averages are shown. The scale bar is at 20 nm. Fourier Shell Correlation curve shows the overall resolution of 3.5Å at FSC=0.143.

(B) Sample density maps of human TMEM175/LAMP-1 contoured at 4σ. The luminal domain of LAMP-1 is disordered.

(C) Cryo-EM data processing scheme of TMEM175/LAMP-1-TM with the same information as that in (A). The final overall resolution is 3.4Å.

(D) EM map (grey, contour at 4σ) with the structural models of TMEM175 dimer (orange) and LAMP-1 TM domains (magenta).

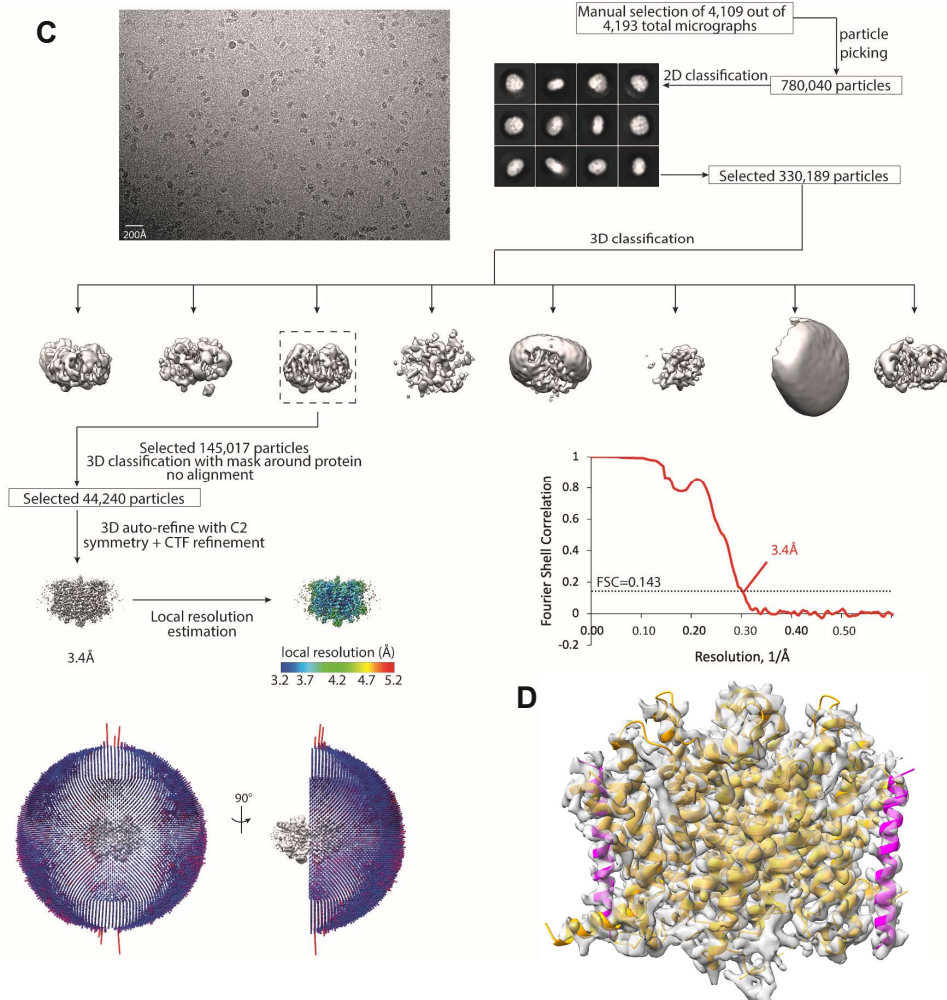



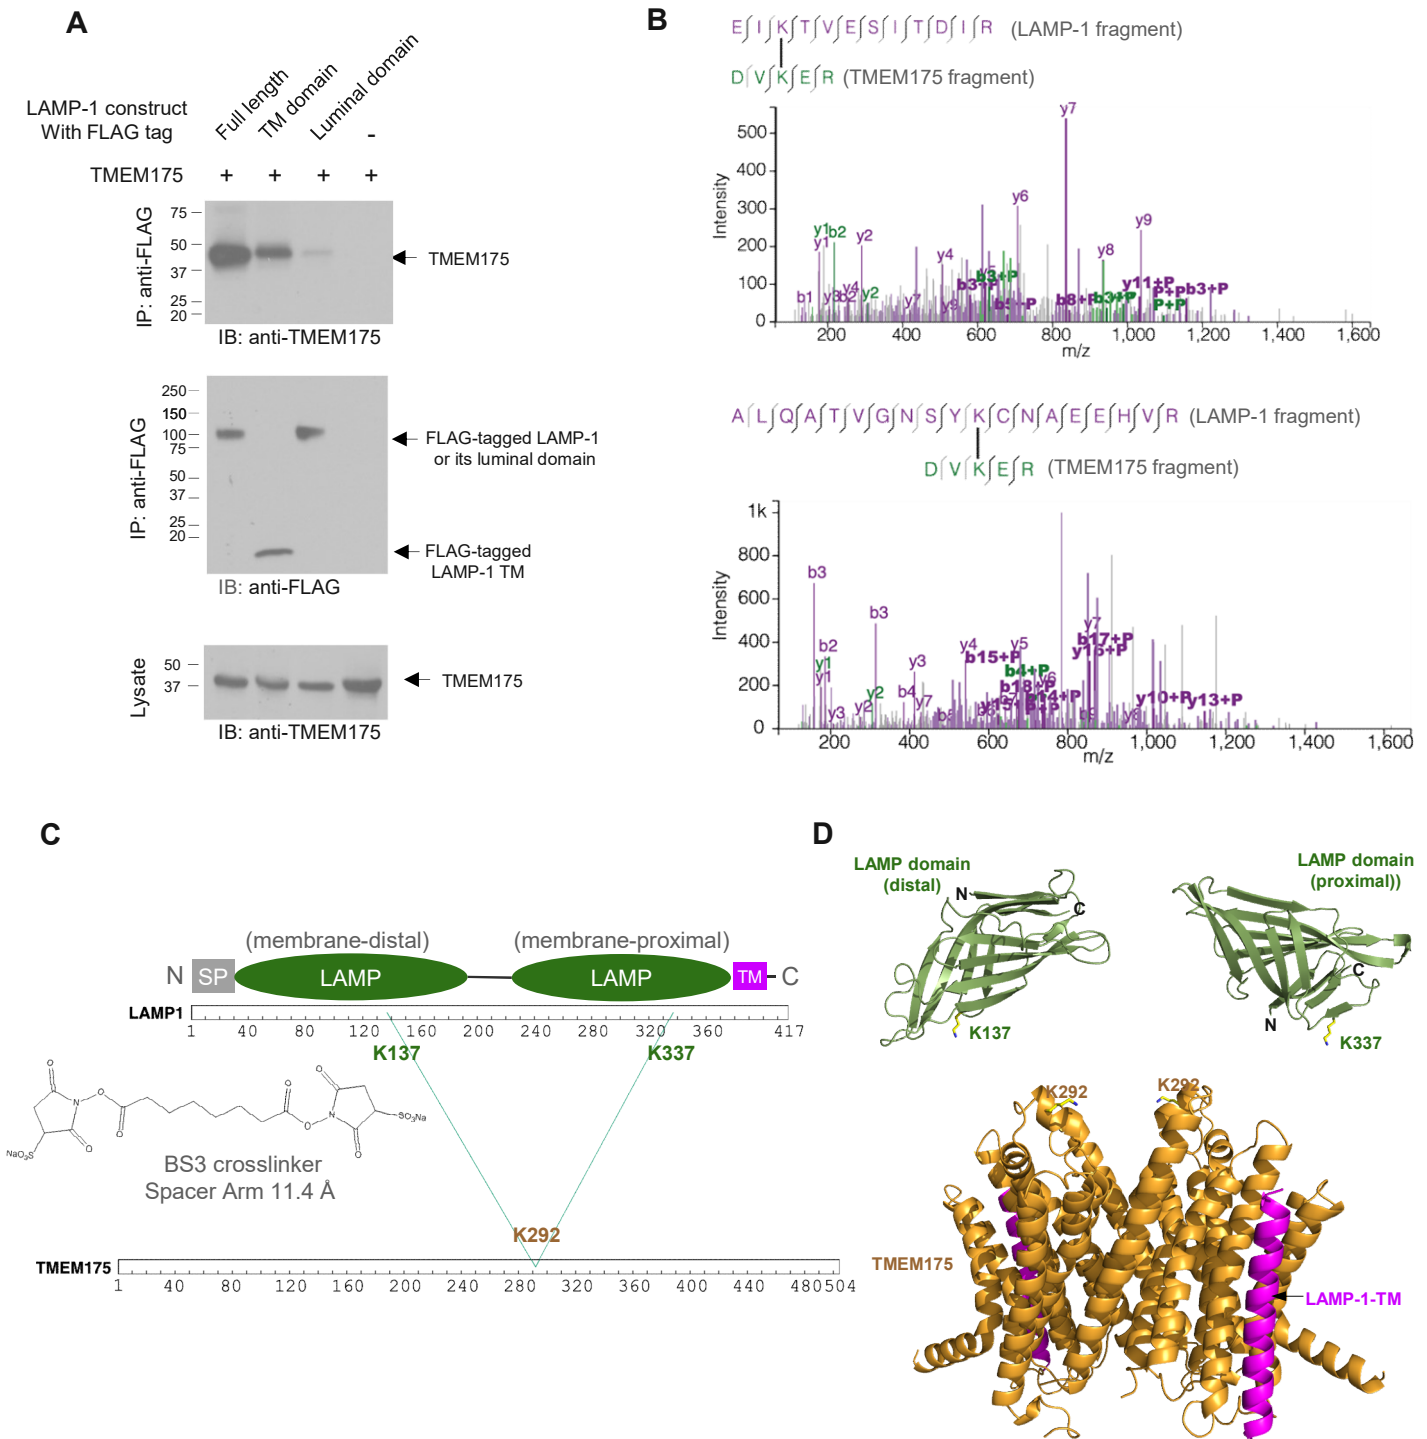

**Figure S5. Transient interactions between the LAMP-1 luminal domain and TMEM175. Related to Figure 4.**

(A) Co-IP of TMEM175 with full-length LAMP-1, LAMP-1 TM or LAMP-1 luminal domain in HEK293 cells co-expressing untagged TMEM175 and FLAG-tagged LAMP-1, LAMP-1 TM or LAMP-1 luminal domain. Overexpressed LAMP-1 or its domains were immunoprecipitated by anti-FLAG antibodies. TMEM175 interacts strongly with the LAMP-1 TM domain but weakly with the LAMP-1 luminal domain.

(B) MS spectra of the crosslinked tryptic peptides from LAMP-1 and TMEM175, respectively.

(C) Mapping the crosslinking lysine residues onto the 1-D sequence of LAMP-1 (K137 and K337) and TMEM175 (K292).

(D) Mapping the crosslinking residues onto the 3-D structures of LAMP domains and TMEM175. AlphaFold was used to predict the two LAMP domain structures which are similar to the crystal structure of the membrane-proximal LAMP domain of human DC-LAMP (PDB code: 4AKM).

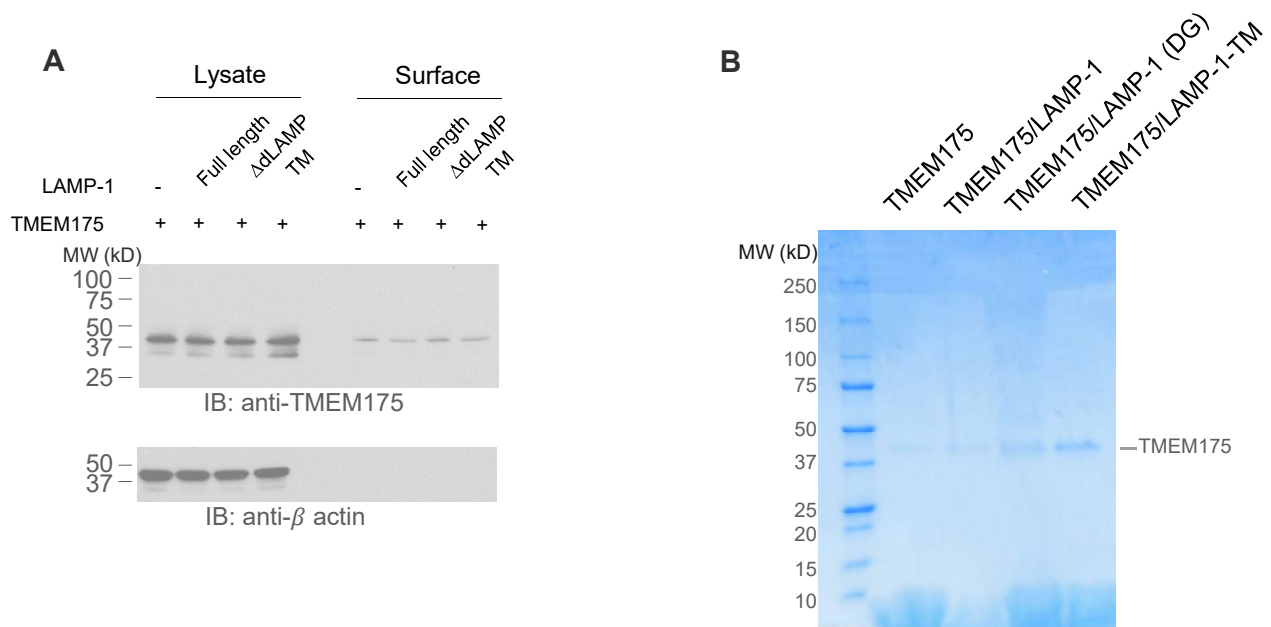

**Figure S6. The protein expression in cells and the amount of TMEM175 in proteoliposomes. Related to Figure 4.**

**(A)** Expression of TMEM175 when co-expressed with WT LAMP-1 or its two deletion mutants (LAMP-1- $\Delta$ dLAMP and LAMP-1-TM) in HEK293 cells used for electrophysiology.

**(B)** SDS-PAGE of proteoliposomes containing TMEM175 alone, TMEM175/LAMP-1, TMEM175/LAMP-1 after de-glycosylation (DG), or TMEM175/LAMP-1-TM indicating a comparable amount of TMEM175 in all liposome samples..

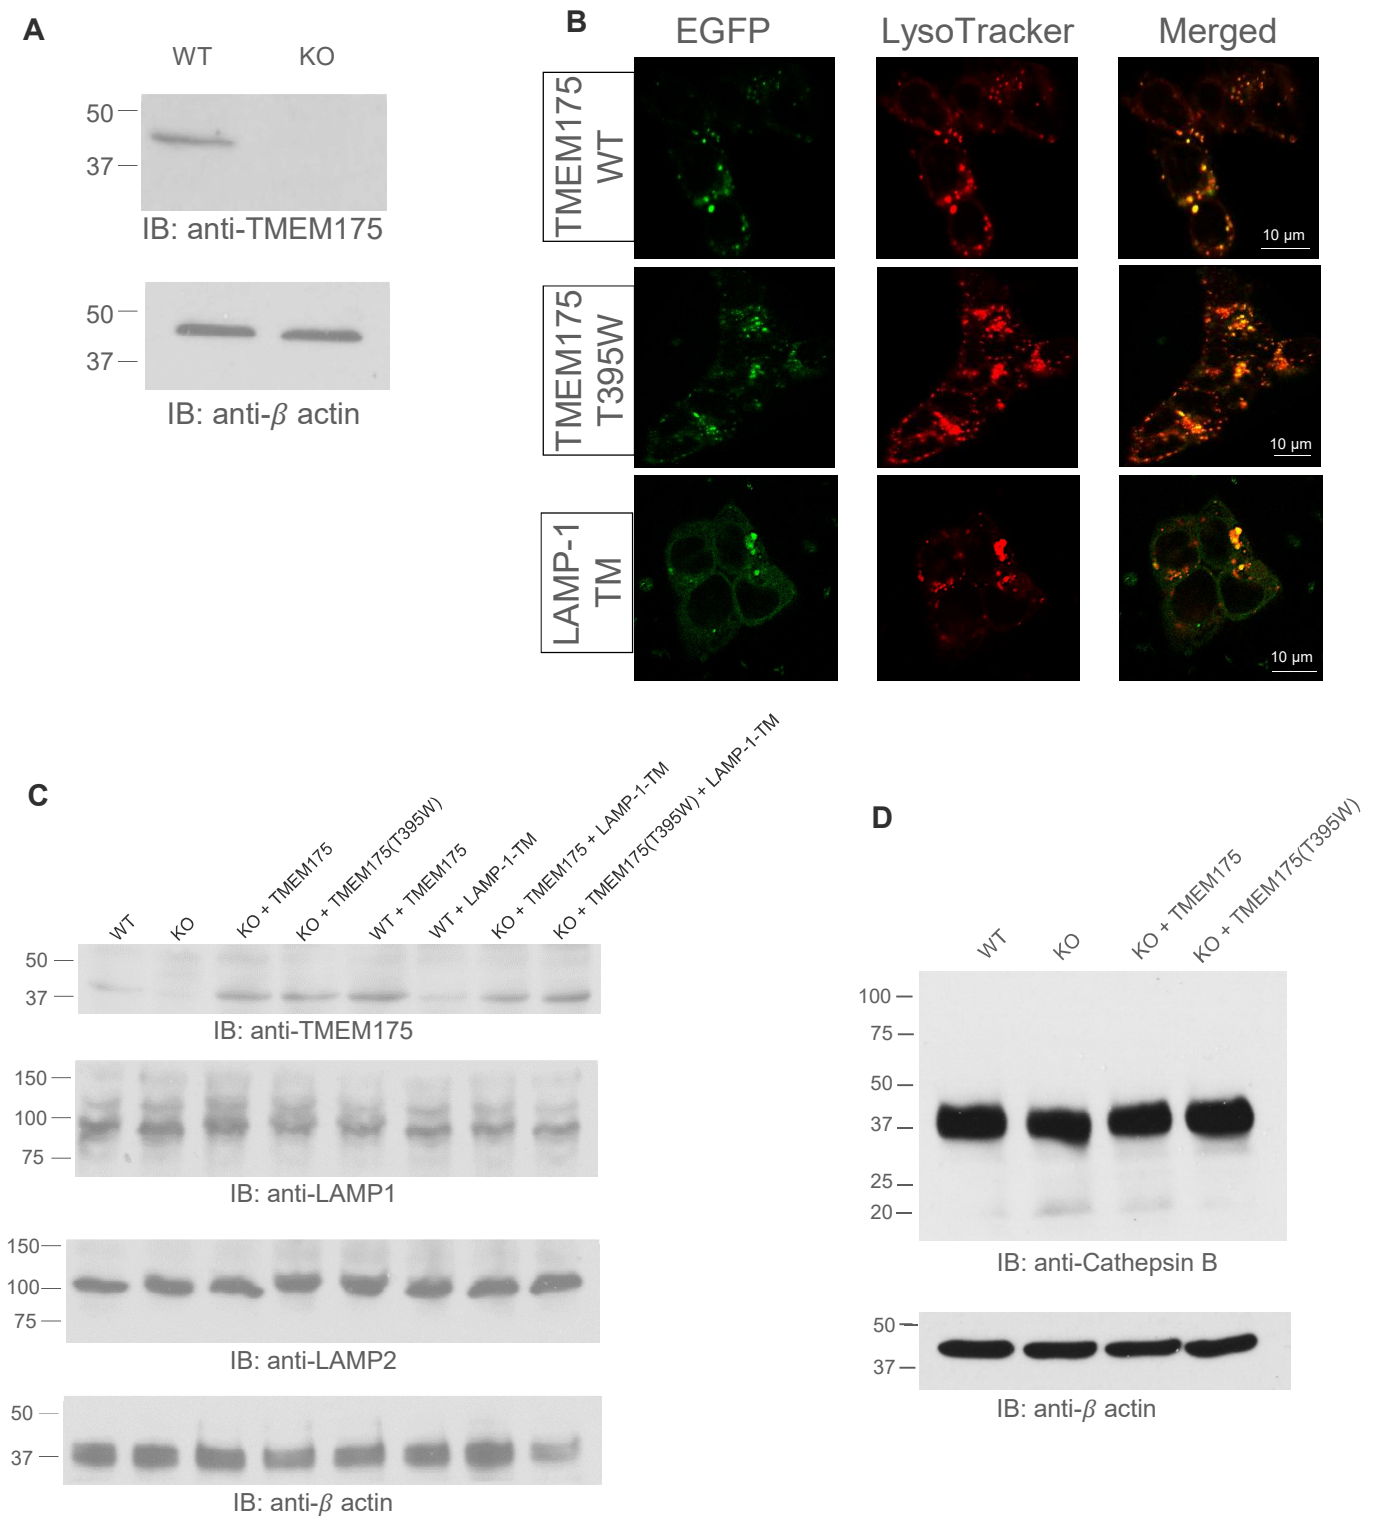

**Figure S7. Protein expression in native and TMEM175-knockout HAP1 cells used for imaging. Related to Figure 6.**

(A) Immunoblotting of TMEM175 in native and KO HAP1 cells.

(B) Co-localization of LysoTracker and GFP-tagged TMEM175, its T395W mutant, and LMAP-1-TM.

(C) TMEM175 expression and endogenous LAMP-1 and LAMP-2 in WT and KO cells used for lysosomal pH measurement.

(D) Cathepsin B expression in all cell samples used for its activity measurement.

| HEK293:                                                                  |               |               |                    |          |                 |                   |              |             |                |            |              |             |              |             |                |             |
|--------------------------------------------------------------------------|---------------|---------------|--------------------|----------|-----------------|-------------------|--------------|-------------|----------------|------------|--------------|-------------|--------------|-------------|----------------|-------------|
| Protein names                                                            | Accession     | # of peptides | # of MS/MS spectra | MW (kDa) | Sequence length | Average abundance | Rep 1        |             | Rep 2          |            | Rep 3        |             | Rep 4        |             | Rep 5          |             |
|                                                                          |               |               |                    |          |                 |                   | TMEM175/Mock | FLAG/IgG    | TMEM175/Mock   | FLAG/IgG   | TMEM175/Mock | FLAG/IgG    | TMEM175/Mock | FLAG/IgG    | TMEM175/Mock   | FLAG/IgG    |
| Beta-1,4-glucuronyltransferase 1                                         | B4GAT1        | 2             | 9                  | 47.119   | 415             | 52239.725         | 578.8        | 578.8       | 316.41         | 316.41     | 65.795       | 65.795 NA   | 0.00234299   | 4.264204124 | 172.47         | 172.47      |
| E3 ubiquitin-protein ligase MYCBP2                                       | MYCBP2        | 3             | 15                 | 513.63   | 4678            | 1279915.025       | 4.930247009  | 7934 NA     | NA             | NA         | 8408         | 8408        | 493795       | 493795      | 50475          | 50475       |
| Lysosome-associated membrane glycoprotein 1                              | LAMP1         | 5             | 16                 | 44.882   | 417             | 1350403.8         | 2.189317187  | 913         | 3367.45        | 3367.45    | 1121.1       | 1121.1      | 87345        | 87345       | 52.71826346    | 9362.5      |
| Lysosome-associated membrane glycoprotein 2                              | LAMP2         | 6             | 22                 | 44.96    | 410             | 4866691.275       | 306.68       | 306.68      | 0.050391796 NA | NA         | NA           | NA          | 200.5825876  | 215185      | 18101.5        | 18101.5     |
| Cornifin-B;Cornifin-A                                                    | SPRR1B;SPRR1A | 4             | 4                  | 9.8875   | 89              | 36659.333         | 28.431       | 28.431      | 86.685         | 86.685 NA  | NA           | NA          | NA           | NA          | 76.975         | 76.975      |
| Succinate dehydrogenase [ubiquinone] flavoprotein subunit, mitochondrial | SDHA          | 8             | 23                 | 72.691   | 664             | 40645.7 NA        | 0.002856368  | 374.735     | 374.735        | 49.8075    | 49.8075      | 0.470967742 | 0.24377313   | 512.95      | 512.95         | 512.95      |
| Voltage-dependent anion-selective channel protein 2                      | VDAC2         | 11            | 61                 | 31.566   | 294             | 957754            | 22.86546931  | 60.32308224 | 11.58085521    | 4313       | 574.6        | 574.6       | 19450.5      | 1.080103287 | 3.941155305    | 30.0718057  |
| Spectrin beta chain, non-erythrocytic 1                                  | SPTBN1        | 16            | 32                 | 274.61   | 2364            | 1223.203          | 67.955       | 67.955      | 285.365        | 285.365    | 129.615      | 129.615     | 1.296279253  | 1.618434012 | 78.99          | 78.99       |
| Peroxiredoxin-4                                                          | PRDX4         | 2             | 3                  | 30.54    | 271             | 16292.033 NA      | NA           | NA          | 44.8465        | 44.8465 NA | NA           | NA          | 397.88       | 397.88      | 61.405         | 61.405      |
| Butyrophilin subfamily 2 member A1                                       | BTN2A1        | 3             | 4                  | 59.632   | 527             | 36022.733         | 17.564       | 17.564      | 246.745        | 246.745 NA | NA           | NA          | 492.765      | 492.765 NA  | NA             | NA          |
| Staphylococcal nuclease domain-containing protein 1                      | SND1          | 8             | 11                 | 102      | 910             | 17697.333         | 129.125      | 129.125     | 92.175         | 92.175 NA  | NA           | NA          | 4678.75      | 4678.75     | 0.002946246 NA | NA          |
| ATPase family AAA domain-containing protein 1                            | ATAD1         | 4             | 5                  | 40.744   | 361             | 64372.667 NA      | NA           | NA          | 112.195        | 112.195 NA | NA           | NA          | 1155.2       | 1155.2      | 301.375        | 301.375     |
| Vitamin K epoxide reductase complex subunit 1                            | VKORC1        | 3             | 7                  | 18.234   | 163             | 190831            | 204.53       | 204.53      | 214.685        | 214.685    | 69.825       | 69.825 NA   | NA           | NA          | 272.675        | 272.675     |
| Transmembrane protein 175                                                | TMEM175       | 20            | 585                | 55.614   | 504             | 132651987.2       | 13.90872394  | 784.3308477 | 53.18446417    | 278660     | 42.54335909  | 113695      | 157.573336   | 277.3486491 | 1401.47459     | 313.7120066 |
| Extended synaptotagmin-1                                                 | ESYT1         | 9             | 15                 | 122.85   | 1104            | 10818.367         | 88.13        | 88.13       | 144.525        | 144.525 NA | NA           | NA          | 3.7737995    | 0.95093189  | 133.955        | 133.955     |
| Transmembrane protein 43                                                 | TMEM43        | 4             | 5                  | 44.875   | 400             | 55600.5           | 201.805      | 201.805     | 65.02          | 65.02 NA   | NA           | NA          | 1847.7       | 1847.7      | 177.835        | 177.835     |
| Centrosome-associated protein CEP250                                     | CEP250        | 2             | 2                  | 281.13   | 2442            | 96069.4           | 60.145       | 60.145 NA   | NA             | NA         | NA           | NA          | 15719.5      | 15719.5     | 24.0695135     | 5180        |
| Thioredoxin-related transmembrane protein 1                              | TMX1          | 3             | 5                  | 31.791   | 280             | 48629 NA          | NA           | NA          | 143.635        | 143.635    | 92.805       | 92.805 NA   | NA           | NA          | 145.085        | 145.085     |
| Reticulon-4                                                              | RTN4          | 5             | 12                 | 129.93   | 1192            | 47529             | 319.25       | 319.25      | 185.54         | 185.54 NA  | NA           | NA          | 2734.2       | 2734.2      | 0.002899433 NA | NA          |
| Transducin beta-like protein 2                                           | TBL2          | 3             | 4                  | 49.797   | 447             | 9099.525          | 190.345      | 190.345     | 28.3715        | 28.3715    | 25.768       | 25.768 NA   | NA           | NA          | 161.585        | 161.585     |

  

| SH-SY5Y:                                                                |           |                    |                    |                        |                 |                   |              |            |               |             |               |            |              |            |        |
|-------------------------------------------------------------------------|-----------|--------------------|--------------------|------------------------|-----------------|-------------------|--------------|------------|---------------|-------------|---------------|------------|--------------|------------|--------|
| Protein names                                                           | Accession | Number of peptides | # of MS/MS spectra | Molecular weight (kDa) | Sequence length | Average abundance | Rep 1        |            | Rep 2         |             | Rep 3         |            | Rep 4        |            |        |
|                                                                         |           |                    |                    |                        |                 |                   | TMEM175/Mock | FLAG/IgG   | TMEM175/Mock  | FLAG/IgG    | TMEM175/Mock  | FLAG/IgG   | TMEM175/Mock | FLAG/IgG   |        |
| Transmembrane protein 175                                               | TMEM175   | 19                 | 240                | 55.614                 | 504             | 38240716.3        | 99.2335781   | 123650     | 29.2219046    | 2244.729    | 112.618821    | 48456.5    | 50.4092585   | 840550     |        |
| Lysosome-associated membrane glycoprotein 1                             | LAMP1     | 6                  | 13                 | 44.882                 | 417             | 1296123.4         | 3350.65      | 3350.65    | 24.6399758    | 2855.65     | 53.7819659    | 4037.95    | 49.7116522   | 87.1181446 |        |
| ATP synthase subunit gamma, mitochondrial                               | ATP5C1    | 4                  | 13                 | 32.996                 | 298             | 260939            | 511.55       | 511.55     | 149.165       | 149.165     | 1.12681005    | 0.520561   | 1.32463583   | 2.27377351 |        |
| Prolactin-inducible protein                                             | PIP       | 5                  | 8                  | 16.572                 | 146             | 184630            | 284.93       | 284.93 NA  | NA            | 0.008267 NA | NA            | NA         | 3932.7       | 3932.7     |        |
| Dolichyl-diphosphooligosaccharide-protein glycosyltransferase subunit 1 | RPN1      | 8                  | 23                 | 68.569                 | 607             | 140464.4          | 850.9        | 850.9      | 23.1525       | 23.1525     | 0.01506251 NA | NA         | 1.37480353   | 1.62651981 |        |
| Lysosome-associated membrane glycoprotein 2                             | LAMP2     | 3                  | 6                  | 44.96                  | 410             | 274165            | 757.2        | 757.2      | 22.0166843    | 1662.7 NA   | NA            | NA         | 110.79       | 110.79     |        |
| Very-long-chain (3R)-3-hydroxyacyl-CoA dehydratase 3                    | HACD3     | 3                  | 8                  | 43.159                 | 362             | 53337.6667        | 112.49       | 112.49 NA  | NA            | 159.285     | 159.285       | 0.70265866 | 226.365      | 1101.2     | 1101.2 |
| Uncharacterized protein KIAA2013                                        | KIAA2013  | 5                  | 5                  | 69.156                 | 634             | 307753 NA         | NA           | NA         | 127.065       | 127.065     | 1.93338514    | 4.307501   | 6690         | 6690       |        |
| 60S ribosomal protein L27a                                              | RPL27A    | 3                  | 6                  | 16.561                 | 148             | 166190.333 NA     | NA           | NA         | 159.285       | 159.285     | 0.70265866    | 226.365    | 1101.2       | 1101.2     |        |
| Serpin H1                                                               | SERPINH1  | 3                  | 9                  | 46.44                  | 418             | 10952.65          | 79.07        | 79.07 NA   | NA            | NA          | 182.36        | 182.36     | 0.79692359   | 1.39689897 |        |
| ERO1-like protein alpha                                                 | ERO1L     | 3                  | 3                  | 54.392                 | 468             | 80242.9667        | 42.3925      | 42.3925 NA | NA            | NA          | 52.105        | 52.105     | 1.36562152   | 2145.05    |        |
| 39S ribosomal protein L12, mitochondrial                                | MRPL12    | 2                  | 3                  | 21.348                 | 198             | 82866             | 613.05       | 613.05 NA  | NA            | NA          | 123.605       | 123.605 NA | NA           | NA         |        |
| Superkiller viralicidal activity 2-like 2                               | SKIVL2    | 3                  | 6                  | 117.8                  | 1042            | 7093.35           | 146.415      | 146.415    | 0.46234581    | 55.285      | 99.305        | 99.305     | 0.90833975   | 0.82286485 |        |
| Cytoskeleton-associated protein 4                                       | CKAP4     | 2                  | 4                  | 66.022                 | 602             | 4770 NA           | NA           | NA         | 16            | 16          | 186.385       | 186.385    | 0.00091299   | 0.00085328 |        |
| 28S ribosomal protein S22, mitochondrial                                | MRPS22    | 2                  | 3                  | 41.28                  | 360             | 37369.8 NA        | NA           | NA         | NA            | NA          | 246.64        | 246.64     | 730.7        | 730.7      |        |
| Neural cell adhesion molecule 1                                         | NCAM1     | 3                  | 5                  | 94.573                 | 858             | 2968.55           | 138.4        | 138.4      | 17.3095       | 17.3095     | 0.01307873 NA | NA         | 0.41159932   | 448.705    |        |
| HLA class I histocompatibility antigen, alpha chain E                   | HLA-E     | 3                  | 5                  | 40.057                 | 358             | 33454.5           | 395.565      | 395.565 NA | NA            | NA          | 158.41        | 158.41 NA  | NA           | NA         |        |
| Guanine nucleotide-binding protein-like 3                               | GNL3      | 3                  | 3                  | 61.992                 | 549             | 8657.85           | 102.7        | 102.7 NA   | NA            | NA          | 134.76        | 134.76     | 0.46177028   | 115.685    |        |
| Complement C3                                                           | C3        | 2                  | 4                  | 187.15                 | 1663            | 17534.55          | 1764.2       | 1764.2 NA  | NA            | NA          | 148.9         | 148.9 NA   | NA           | NA         |        |
| Golgi phosphoprotein 3                                                  | GOLPH3    | 2                  | 2                  | 33.81                  | 298             | 15573.5           | 169.72       | 169.72     | 32.7005       | 32.7005 NA  | NA            | NA         | NA           | NA         |        |
| Arachidonate 12-lipoxygenase, 12R-type                                  | ALOX12B   | 2                  | 2                  | 80.355                 | 701             | 9991.45           | 95.965       | 95.965     | 0.03058665 NA | NA          | NA            | NA         | 352.545      | 352.545    |        |
| Protein PRRC2C                                                          | PRRC2C    | 2                  | 2                  | 316.91                 | 2896            | 1288.445          | 95.43        | 95.43 NA   | NA            | NA          | 0.00865988    | 0.017873   | 102.69       | 102.69     |        |

Table S1. Putative TMEM175-interacting proteins from proteomic analysis. Related to Figure 1A and 1B.
